# Supplementary material for: A Comparison of Wintertime Atmospheric Boundary Layer Heights Determined by Tethered Balloon Soundings and Lidar at the Site of SACOL
Source: MDPI journal article supplement (doi:10.3390/rs13091781), 2021-05-03
Supplement: s1 [file s1]

Archive with 1 entries (1 files):
- remotesensing-1201549-supplementary.pdf
