# Supplementary material for: A Comparison of Wintertime Atmospheric Boundary Layer Heights Determined by Tethered Balloon Soundings and Lidar at the Site of SACOL
Source: MDPI journal article supplement (doi:10.3390/rs13091781), 2021-05-03
Supplement: s1 [file s1 › remotesensing-1201549-supplementary.pdf]

# A Comparison of Wintertime Atmospheric Boundary Layer Heights Determined by Tethered Balloon Soundings and Lidar at the Site of SACOL

Min Zhang <sup>1</sup>, Pengfei Tian <sup>1,\*</sup>, Huiyu Zeng <sup>1</sup>, Ligong Wang<sup>1</sup>, Jiening Liang <sup>1</sup>, Xianjie Cao <sup>1</sup> and Lei Zhang <sup>1,2</sup>

- 1 Key Laboratory for Semi-Arid Climate Change of the Ministry of Education, College of Atmospheric Sciences, Lanzhou University, Lanzhou 730000, China; zhangm2019@lzu.edu.cn (M.Z.); tianpf@lzu.edu.cn (P.T.); zenghy19@lzu.edu.cn (H.Z.); wanglg20@lzu.edu.cn (L.W.); liangjn@lzu.edu.cn (J.L.); caoxj@lzu.edu.cn (X.C.); zhanglei@lzu.edu.cn (L.Z.)
- 2 Collaborative Innovation Center for Western Ecological Safety, Lanzhou University, Lanzhou 730000, China; zhanglei@lzu.edu.cn (L.Z.)
- \* Correspondence: tianpf@lzu.edu.cn

**Table S1.** Detailed information of the tethered sounding system KZXLT-II.

|                       |                                                               |
|-----------------------|---------------------------------------------------------------|
| Balloon material      | Polyethylene composite film, Polyurethane, etc.               |
| Volume                | 10 m <sup>3</sup>                                             |
| Load                  | 1.4-2 kg                                                      |
| Rope material         | High strength and high modulus materials                      |
| Rope pull             | 1500 N                                                        |
| Rate of rise and fall | 0~60 m·min <sup>-1</sup> (Continuous-adjustable)              |
| Atmospheric pressure  | 300~110 hPa (±0.5 hPa)                                        |
| Temperature           | -40~50 °C (±0.2 °C)                                           |
| Relative humidity     | 0~100 % (±2 %)                                                |
| Wind direction        | 0~360° (Resolution is 0.5°)                                   |
| Wind speed            | 0~20 m·s <sup>-1</sup> (Resolution is 0.1 m·s <sup>-1</sup> ) |
| GPS                   | Resolution is 3 m                                             |

**Table S2.** Detailed information of the Sigma MiniMPL lidar

|                          |                                            |
|--------------------------|--------------------------------------------|
| Material                 | NASA Space Department materials            |
| Detector                 | Avalanche laser APD, Photon counting model |
| Laser wavelength         | 532 nm                                     |
| Pulse frequency          | 2500 Hz                                    |
| Pulse energy             | 3~4 $\mu$ J                                |
| Maximum detectable range | 15 km                                      |
| Time resolution          | 1 min                                      |
| Vertical resolution      | 30 m                                       |
| Blind zone               | 100 m                                      |

$$bias = \frac{1}{m} \sum_{i=1}^m (x_i - y_i) \quad (S1)$$

$$standard\ deviation = \sqrt{\frac{1}{m} \sum_{i=1}^m \left( (x_i - y_i) - \overline{(x - y)} \right)^2} \quad (S2)$$

$$t = \frac{\overline{X} - y}{S} \sqrt{N} \quad (S3)$$

where  $\overline{X}$  is the mean of the aerosol BLH samples,  $y$  is the radiosonde BLHs mean,  $S$  is the standard deviation of samples differences, and  $N$  is the number of pair samples. It was not rejected when the calculated  $t$  test value ( $t$ ) was within  $\pm 1.96$  and the  $p$  value was greater than 0.05 or 5% significance level.

$$root - mean - square\ error = \sqrt{\frac{1}{m} \sum_{i=1}^m (x_i - y_i)^2} \quad (S4)$$

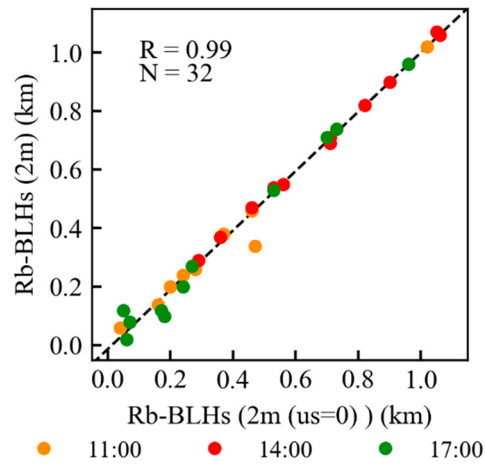

**Figure S1.** Comparisons between BLHs derived from bulk Richardson number (Rb) method with  $us=0$  and  $us \neq 0$  in daytime

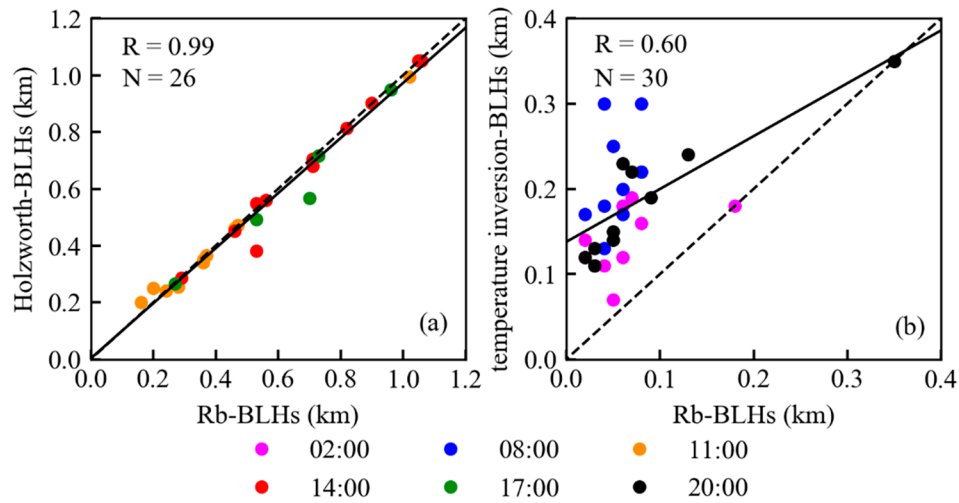

**Figure S2.** Comparisons between BLHs derived from bulk Richardson number (Rb) method and tethered balloon sounding (TBS) method (a) Holzworth method in daytime and (b) temperature inversion method in nighttime

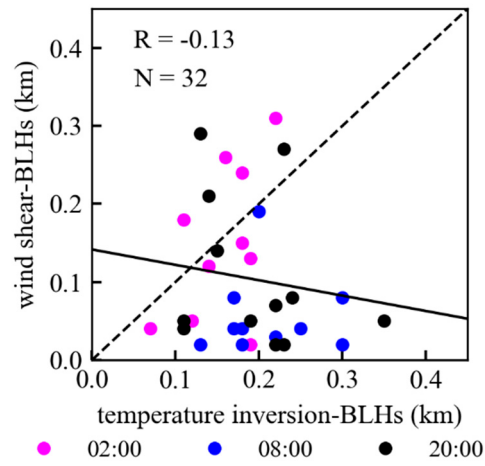

**Figure S3.** Comparisons between BLHs derived from temperature inversion method and wind shear method in nighttime

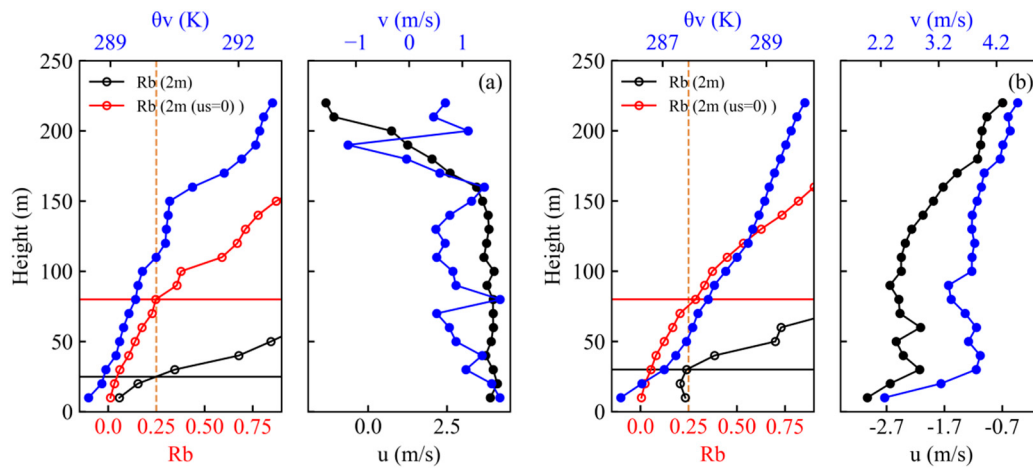

**Figure S4.** Profiles of (a) 02:00 (Beijing time) and (b) 08:00 (Beijing time), 24 December 2019 explain the low SBL height when the  $u_s$  and  $v_s$  were not set to zero in the bulk Richardson number (Rb) method in nighttime

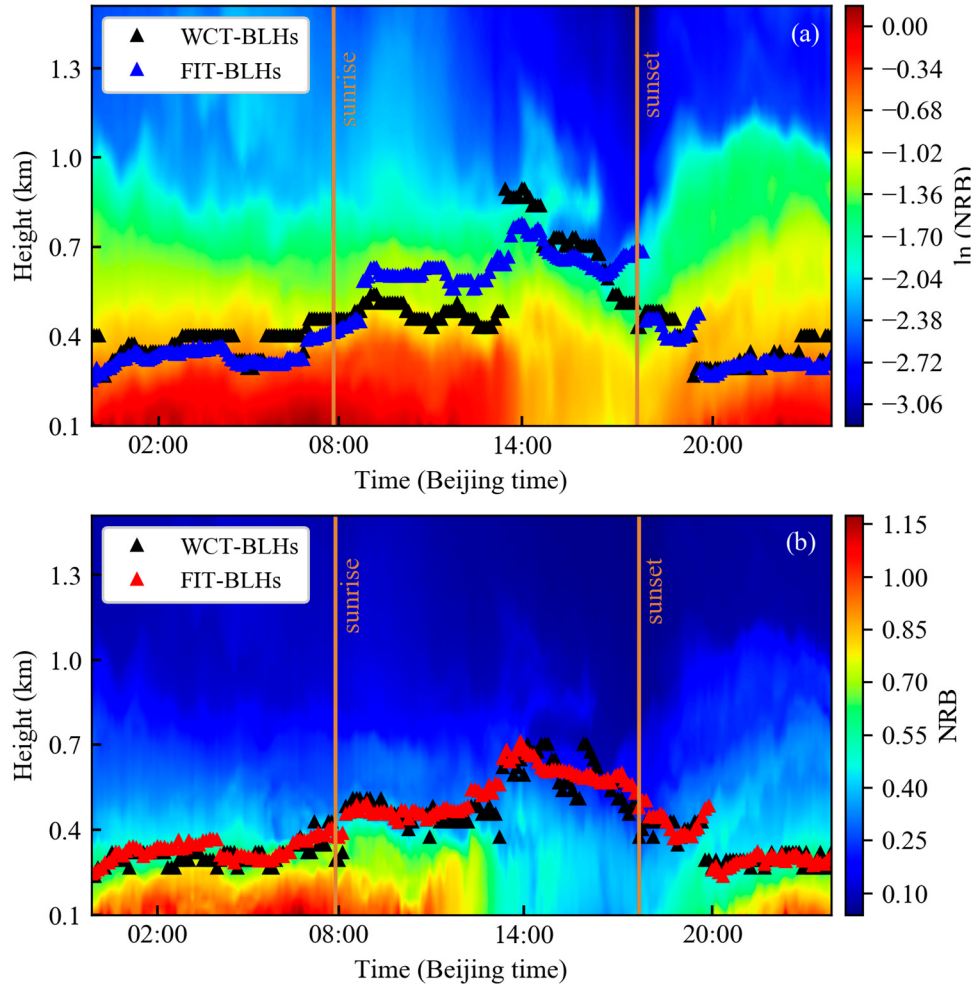

**Figure S5.** Difference of atmospheric aerosols and BLHs by Wavelet Covariance Transform (WCT) and Ideal Profile Fitting (FIT) method on 12 December 2019 (a) based on logarithm of the normalized range-corrected backscattering signal ( $\ln(\text{NRB})$ ) and (b) normalized range-corrected backscattering signal (NRB)

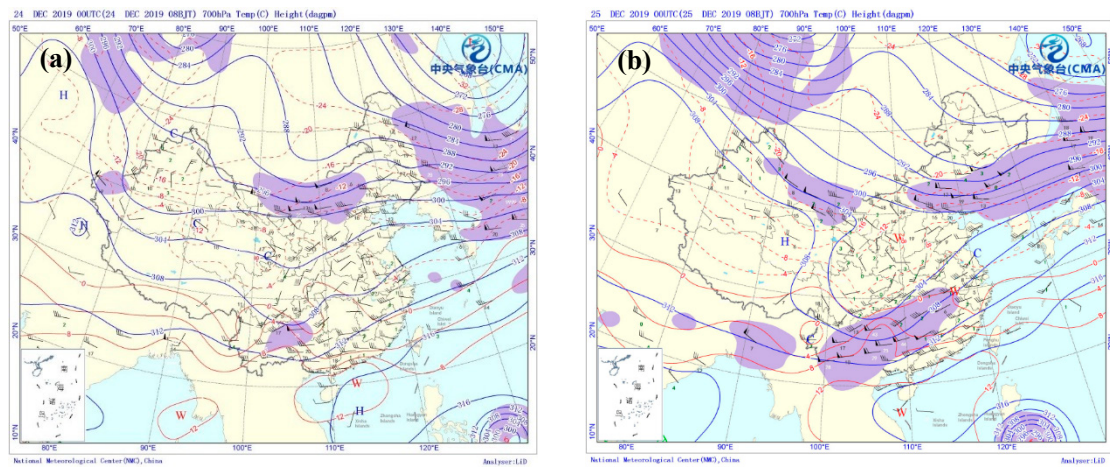

**Figure S6.** Weather maps at 700hPa on (a) 24 December and (b) 25 December 2019

(The Weather maps are available from <http://www.nmc.cn/> )

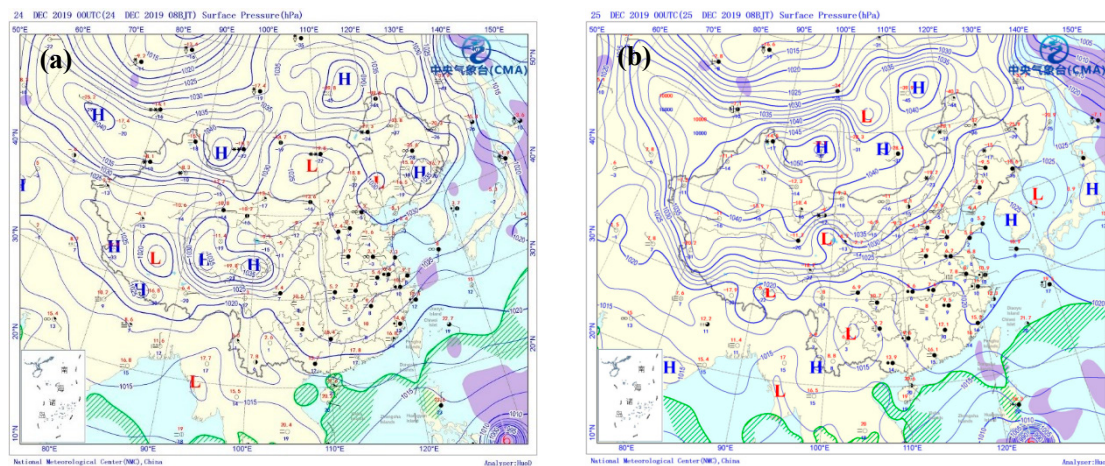

**Figure S7.** Weather maps at surface on (a) 24 December and (b) 25 December 2019

(The Weather maps are available from <http://www.nmc.cn/> )

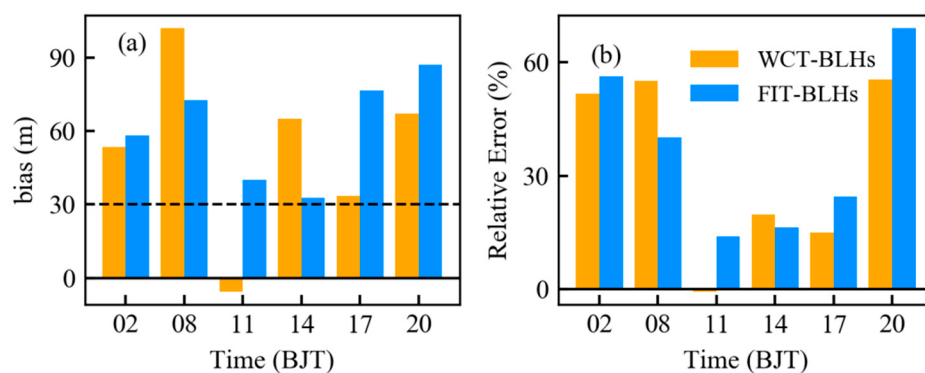

**Figure S8.** (a) bias and (b) relative errors between lidar-BLHs and TBS-BLHs. The WCT-BLHs and FIT-BLHs were BLHs derived by WCT and FIT methods based on lidar data, respectively.
